# Supplementary material for: Transcriptome Analysis of Ovarian Follicles Reveals Potential Pivotal Genes Associated With Increased and Decreased Rates of Chicken Egg Production
Source: Front Genet. 2021 Mar 10;12:622751. doi: 10.3389/fgene.2021.622751 (PMC7987945; doi:10.3389/fgene.2021.622751)
Supplement: Supplementary Table 14 — Co-expressed DEGs in LWF and SYF follicles of HR and LR hens. [file Table_9.XLSX]

## Sheet: co-expressed DEGs
gene_id	H1_vs_L1_de	H1_vs_L1_log2fc	H1_vs_L1_pval	H2_vs_L2_de	H2_vs_L2_log2fc	H2_vs_L2_pval	Name	GO	KEGG	EC	eggNOG Class	eggNOG	Description	NCBI_GI	UniProtID
ENSGALG00000001573	up	1.70952	0.0247012	up	1.70952	0.0382812	P2RX1	GO:0001614;GO:0004931;GO:0005216;GO:0005524;GO:0005887;GO:0006811;GO:0006811;GO:0016020;GO:0016020;GO:0016021;GO:0033198;GO:0035590;GO:0060079;GO:0098655;GO:0098794;GO:0001614;GO:0001614;GO:0001614;GO:0001614;GO:0002554;GO:0003056;GO:0004931;GO:0004931;GO:0005216;GO:0005261;GO:0005261;GO:0005524;GO:0005639;GO:0005887;GO:0006811;GO:0006811;GO:0006811;GO:0006811;GO:0006812;GO:0006919;GO:0006940;GO:…	K05215	-	S	NOG47843	purinergic receptor P2X 1 [Source:NCBIgene;Acc:395190]	395190	Q8AWC0
ENSGALG00000001698	up	2.20835	4.84989e-07	up	1.75862	1.21164e-05	GABRA1	GO:0004888;GO:0004890;GO:0005216;GO:0005230;GO:0005237;GO:0005254;GO:0005254;GO:0005886;GO:0005886;GO:0005887;GO:0006811;GO:0006811;GO:0006821;GO:0006821;GO:0007165;GO:0007214;GO:0007214;GO:0007268;GO:0016020;GO:0016020;GO:0016021;GO:0016021;GO:0022851;GO:0022851;GO:0030054;GO:0032590;GO:0034220;GO:0034220;GO:0034707;GO:0042391;GO:0043005;GO:0045202;GO:0045202;GO:0045211;GO:0050877;GO:0051932;GO:…	K05175	-	-	NOG238757	gamma-aminobutyric acid type A receptor alpha1subunit [Source:NCBI gene;Acc:374214]	374214	P19150
ENSGALG00000002557	up	1.66179	0.0363853	up	2.6266	0.0187164	ADGRD1	GO:0004888;GO:0004930;GO:0004930;GO:0004930;GO:0005622;GO:0005886;GO:0005887;GO:0007166;GO:0007186;GO:0007186;GO:0007189;GO:0007189;GO:0016020;GO:0016021;GO:0016021;GO:0004888;GO:0004930;GO:0007166;GO:0007186;GO:0016020;GO:0016021;GO:0016021;	K08465	-	-	-	adhesion G protein-coupled receptor D1 [Source:HGNCSymbol;Acc:HGNC:19893]	416803	A0A2H4I7A1
ENSGALG00000006073	down	-1.25244	0.00620187	down	-1.04376	0.0179887	NDUFAB1	GO:0000035;GO:0000036;GO:0005654;GO:0005739;GO:0005747;GO:0005762;GO:0005829;GO:0006633;GO:0006633;GO:0009245;GO:0009249;GO:0031177;GO:0032981;	-	-	-	-	NADH:ubiquinone oxidoreductase subunit AB1[Source:HGNC Symbol;Acc:HGNC:7694]	-	-
ENSGALG00000006608	up	1.12384	0.00619331	up	1.46687	0.0011742	-	GO:0000166;GO:0000287;GO:0005737;GO:0005829;GO:0008253;GO:0008253;GO:0009117;GO:0016311;	K01081	EC:3.1.3.5	-	-	cytosolic 5'-nucleotidase 1A-like [Source:NCBIgene;Acc:770392]	770392	E1BUB4
ENSGALG00000007252	down	-1.08262	0.0188765	up	1.04681	0.0363821	ANKDD1A	GO:0007165;	-	-	-	-	ankyrin repeat and death domain containing 1A[Source:NCBI gene;Acc:415525]	415525	E1C118
ENSGALG00000010595	up	1.54747	0.0103356	up	1.32604	0.0187199	GPR65	GO:0004930;GO:0004930;GO:0004930;GO:0004930;GO:0005622;GO:0005886;GO:0005887;GO:0007165;GO:0007186;GO:0007186;GO:0007186;GO:0007189;GO:0010447;GO:0016020;GO:0016021;GO:0016021;GO:0031532;GO:0035025;GO:0051482;GO:0051496;GO:0090630;	K08416	-	-	-	G protein-coupled receptor 65 [Source:HGNCSymbol;Acc:HGNC:4517]	423395	-
ENSGALG00000011551	down	-1.566	0.00232893	up	3.54973	0.0313061	JCHAIN	GO:0002250;GO:0003094;GO:0003697;GO:0005615;GO:0019731;GO:0019862;GO:0019862;GO:0019862;GO:0030674;GO:0031210;GO:0032461;GO:0032461;GO:0034987;GO:0034987;GO:0034987;GO:0034987;GO:0042803;GO:0042834;GO:0045087;GO:0060267;GO:0071748;GO:0071750;GO:0071750;GO:0071750;GO:0071751;GO:0071752;GO:0071756;GO:0071756;	-	-	-	-	joining chain of multimeric IgA and IgM[Source:NCBI gene;Acc:374117]	374117	E1BY93
ENSGALG00000012613	up	1.36606	0.0402301	down	-1.49617	0.000238899	FBP1	GO:0005975;GO:0016311;GO:0016791;GO:0000122;GO:0005634;GO:0005737;GO:0005737;GO:0005829;GO:0005975;GO:0005975;GO:0005986;GO:0006000;GO:0006002;GO:0006002;GO:0006094;GO:0006094;GO:0006111;GO:0016208;GO:0016311;GO:0016787;GO:0016791;GO:0030308;GO:0030388;GO:0035690;GO:0042132;GO:0042132;GO:0042132;GO:0042578;GO:0042802;GO:0045820;GO:0046580;GO:0046872;GO:0051289;GO:0071286;	K03841	EC:3.1.3.11	G	COG0158	fructose-bisphosphatase 1 [Source:NCBIgene;Acc:395218]	395218	F6QGI8
ENSGALG00000013723	up	1.28826	0.00137888	up	5.41966	3.26963e-11	OASL	GO:0001730;GO:0003723;GO:0003725;GO:0003725;GO:0005524;GO:0005634;GO:0005654;GO:0005829;GO:0006955;GO:0016740;GO:0016779;GO:0051607;GO:0060700;	K14608	-	-	-	2'-5'-oligoadenylate synthetase like [Source:NCBIgene;Acc:395908]	395908	O13256
ENSGALG00000015737	down	-1.91015	0.00492898	down	-6.87125	0.00131071	NCAM2	GO:0005886;GO:0007155;GO:0016020;GO:0016020;GO:0016021;GO:0016604;GO:0030424;GO:0042802;GO:0007155;GO:0016020;GO:0016020;GO:0016021;	K06491	-	-	-	neural cell adhesion molecule 2 [Source:HGNCSymbol;Acc:HGNC:7657]	427968	-
ENSGALG00000016044	down	-3.5272	1.41743e-07	up	4.65425	0.000508535	SIM2	GO:0000122;GO:0000981;GO:0003677;GO:0003677;GO:0003677;GO:0003700;GO:0005634;GO:0005634;GO:0005634;GO:0005634;GO:0005654;GO:0006351;GO:0006355;GO:0006355;GO:0006357;GO:0009880;GO:0016604;GO:0030324;GO:0045892;GO:0046982;GO:0046983;	K09100	-	-	-	SIM bHLH transcription factor 2 [Source:HGNCSymbol;Acc:HGNC:10883]	418515	E1BSJ1
ENSGALG00000016142	up	1.53308	2.68132e-05	up	4.18556	2.06956e-24	MX1	GO:0000166;GO:0000266;GO:0003374;GO:0003924;GO:0003924;GO:0005525;GO:0005525;GO:0005634;GO:0005737;GO:0008017;GO:0016020;GO:0031966;GO:0045087;GO:0051607;GO:0061025;	K14754	-	-	-	MX dynamin like GTPase 1 [Source:NCBIgene;Acc:395313]	395313	Q90597
ENSGALG00000016661	up	1.22932	0.00853401	up	1.3837	0.00344564	BLK	GO:0000166;GO:0004672;GO:0004713;GO:0004713;GO:0004715;GO:0004715;GO:0004715;GO:0005102;GO:0005524;GO:0005524;GO:0006468;GO:0007169;GO:0016301;GO:0016310;GO:0016740;GO:0030154;GO:0031234;GO:0032024;GO:0038083;GO:0050853;	K08890	EC:2.7.10.2	-	-	BLK proto-oncogene, Src family tyrosine kinase[Source:HGNC Symbol;Acc:HGNC:1057]	422035	-
ENSGALG00000016868	down	-1.23192	0.00563457	up	1.41621	0.000100602	NALCN	GO:0005216;GO:0005261;GO:0006811;GO:0016020;GO:0016020;GO:0016021;GO:0034220;GO:0055085;GO:0098655;	K21863	-	-	-	sodium leak channel, non-selective [Source:HGNCSymbol;Acc:HGNC:19082]	418770	E1BSL8
ENSGALG00000017005	up	1.03543	0.000878316	up	1.0371	0.00150237	CAB39L	GO:0005622;GO:0023014;	K08272	-	-	-	calcium binding protein 39 like [Source:NCBIgene;Acc:418865]	418865	F1NV80
ENSGALG00000017046	up	1.08311	0.0324949	up	2.23261	0.0282144	POSTN	GO:0005615;GO:0005802;GO:0007155;GO:0007155;GO:0007155;GO:0008201;GO:0008593;GO:0009888;GO:0030198;GO:0030198;GO:0031012;GO:0031012;GO:0031012;GO:0046872;GO:0050839;GO:0071307;GO:0071307;GO:0016020;GO:0016021;	-	-	-	-	periostin [Source:NCBI gene;Acc:395429]"	395429	Q6DMS3
ENSGALG00000023622	up	1.8059	0.0408883	up	4.75618	0.00574661	AVD	GO:0005576;GO:0009374;GO:0019731;	-	-	-	NOG316013	avidin [Source:NCBI gene;Acc:396260]"	396260	P02701
ENSGALG00000023781	up	1.01626	0.00832704	up	1.12004	0.0210807	TREM2	GO:0016020;GO:0016021;GO:0016020;GO:0016021;	K14378	-	R	NOG42611	triggering receptor expressed on myeloid cells 2[Source:NCBI gene;Acc:419920]	419920	Q2YHU4
ENSGALG00000027765	up	1.15202	0.00230296	up	1.5318	0.000626605	MMR1L1	GO:0004888;GO:0016020;GO:0016021;	K06560	-	-	-	Gallus gallus macrophage mannose receptor 1-like 1(MMR1L1), mRNA. [Source:RefSeq mRNA;Acc:NM_001318433]	771876	M1XJF4
ENSGALG00000028016	up	2.12903	0.00820928	up	3.12512	6.65579e-08	-	-	-	-	-	-	eye-globin [Source:NCBI gene;Acc:417972]"	-	-
ENSGALG00000028982	up	1.15888	0.00825814	up	3.29096	4.86557e-11	CMPK2	GO:0004127;GO:0004550;GO:0004798;GO:0004798;GO:0005524;GO:0005737;GO:0005739;GO:0006165;GO:0006227;GO:0006233;GO:0006233;GO:0006235;GO:0009041;GO:0009142;GO:0033862;GO:0046940;GO:0050145;GO:0071222;	K13809	EC:2.7.4.14	-	-	cytidine/uridine monophosphate kinase 2[Source:HGNC Symbol;Acc:HGNC:27015]	421921	R4GJC4
ENSGALG00000030368	down	-1.60235	0.00680766	up	3.60292	1.61064e-05	-	GO:0006955;GO:0016020;GO:0016020;GO:0016021;GO:0019882;GO:0042613;GO:0006955;GO:0016020;GO:0016020;GO:0016021;GO:0019882;GO:0042613;	K06752	-	-	-	Major histocompatibility complex class II betachain BLB3 [Source:NCBI gene;Acc:425256]	425256	-
ENSGALG00000031578	up	1.9233	0.0215788	up	1.17559	0.0149394	CSMD3	GO:0005886;GO:0016020;GO:0016021;GO:0050773;GO:0016020;GO:0016021;	K17495	-	-	-	CUB and Sushi multiple domains 3 [Source:HGNCSymbol;Acc:HGNC:19291]	420279	A0A1D5PZY2
ENSGALG00000032701	up	1.26957	0.0230824	up	1.72507	0.00315742	LY96	GO:0001530;GO:0001875;GO:0031226;GO:0031663;GO:0031666;GO:0032496;GO:0032497;GO:0032760;GO:0034142;GO:0035662;GO:0045087;GO:0046696;GO:0046696;GO:0071222;	K05400	-	-	-	lymphocyte antigen 96 [Source:HGNCSymbol;Acc:HGNC:17156]	420189	-
ENSGALG00000038879	down	-3.53977	5.05972e-20	up	2.33336	2.02917e-06	-	GO:0008168;GO:0032259;GO:0008168;GO:0032259;GO:0008168;GO:0032259;GO:0008168;GO:0032259;	-	-	-	-	putative methyltransferase DDB_G0268948[Source:NCBI gene;Acc:107048987]	107048987	A0A1D5P5L5
ENSGALG00000039340	up	4.26708	5.291e-10	down	-2.78845	0.0005289	LOC107054697	GO:0016020;GO:0016021;	-	-	-	-	C-type lectin domain family 2 member D-like[Source:NCBI gene;Acc:107054697]	107054697	-
ENSGALG00000040035	up	1.5427	0.0292218	up	1.26176	0.0387819	ADRB2	GO:0001540;GO:0001993;GO:0002024;GO:0002025;GO:0002025;GO:0002028;GO:0002032;GO:0004930;GO:0004930;GO:0004935;GO:0004935;GO:0004941;GO:0004941;GO:0004941;GO:0004941;GO:0005634;GO:0005886;GO:0005886;GO:0005887;GO:0005887;GO:0006898;GO:0006940;GO:0007165;GO:0007186;GO:0007186;GO:0007188;GO:0007189;GO:0007189;GO:0007190;GO:0008179;GO:0009409;GO:0010739;GO:0010739;GO:0015459;GO:0016020;GO:0016020;GO:…	-	-	-	-	adrenoceptor beta 2 [Source:HGNCSymbol;Acc:HGNC:286]	-	-
ENSGALG00000041858	up	2.01135	0.0478958	down	-1.40808	0.0280924	LOC100857659	GO:0005198;GO:0005198;GO:0005882;GO:0005882;GO:0005198;GO:0005198;GO:0005882;GO:0005882;GO:0005198;GO:0005198;GO:0005882;GO:0005882;	-	-	-	-	keratin, type I cytoskeletal 42-like [Source:NCBIgene;Acc:100857659]	-	-
ENSGALG00000045085	up	1.18422	0.0148479	up	5.62922	1.76347e-17	IFIT5	GO:0003723;GO:0005829;GO:0051607;	-	-	-	-	Gallus gallus interferon induced protein withtetratricopeptide repeats 5 (IFIT5), mRNA. [Source:RefSeqmRNA;Acc:NM_001320422]	423790	A0A125RM76
